# Supplementary material for: One-pot one-step synthesis of Au@SiO2 core–shell nanoparticles and their shell-thickness-dependent fluorescent properties
Source: Royal Society of Chemistry journal article supplement (doi:10.1039/c9ra02543j), 2019-01-01
Supplement: c9ra02543j1.pdf [file c9ra02543j1.pdf]

Supplementary Information

**One-pot one-step synthesis of Au@SiO<sub>2</sub> core-shell nanoparticles and their shell-thickness-dependent fluorescent properties**

Shan Zhang, Xiaochuan Xu, Guoyu Zhang, Bin Liu and Jianhui Yang\*

Key Laboratory of Synthetic and Natural Functional Molecule Chemistry of Ministry of Education, Shaanxi Key Laboratory of Physico-Inorganic Chemistry, College of Chemistry & Materials Science, Northwest University, Xi'an 710127, People's Republic of China. E-mail: jianhui@nwu.edu.cn

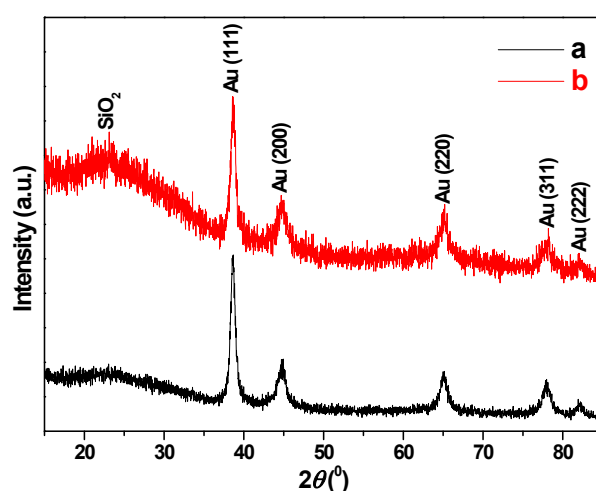

**Fig. S1** XRD pattern of the products synthesized in the absence (a) and presence (b) of TEOS by the typical synthesis.

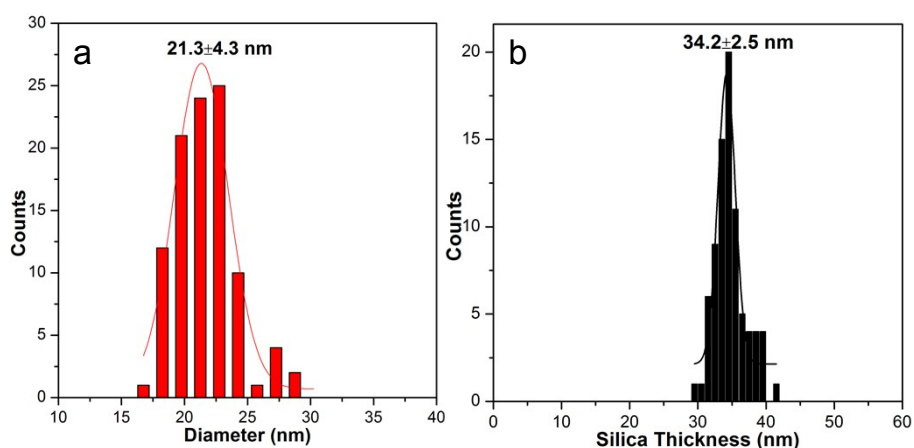

**Fig. S2** The size distributions of Au core (a) and the shell thickness (b) of the Au@SiO<sub>2</sub> core-shell NPs shown in Fig. 1.

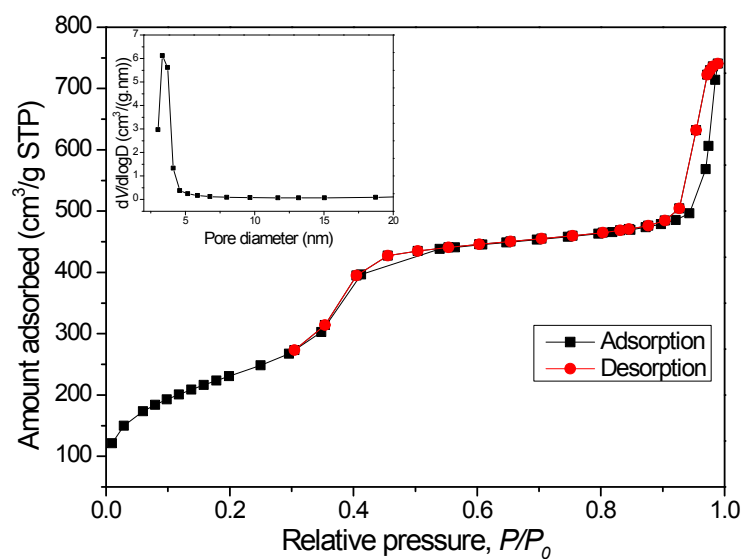

**Fig. S3** N<sub>2</sub> sorption isotherms of the Au@SiO<sub>2</sub> NPs obtained by the typical synthesis.

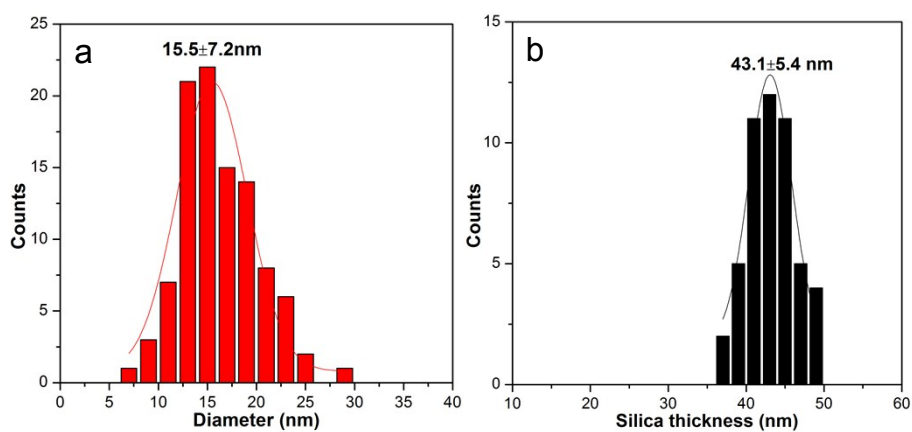

**Fig. S4** The size distributions of Au core (a) and the shell thickness (b) of the Au@SiO<sub>2</sub> core-shell NPs shown in Fig. 2a.

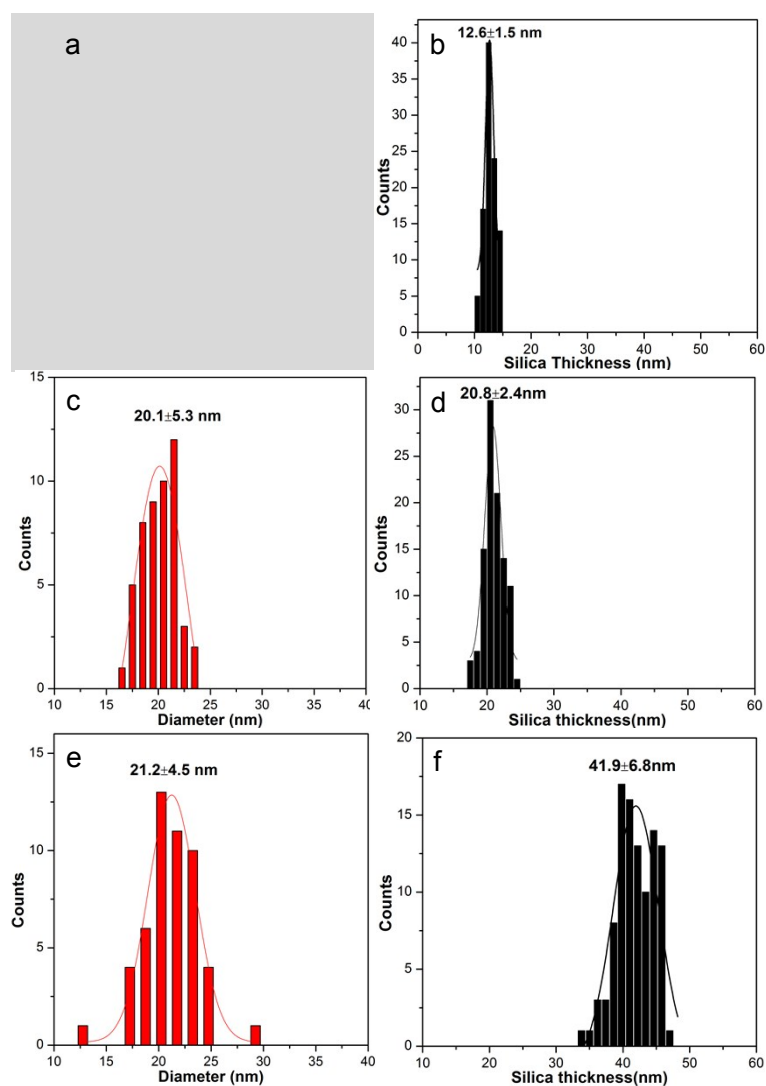

**Fig. S5** The size distributions of Au core (a, c, e) and the shell thickness (b, d, f) of the Au@SiO<sub>2</sub> core-shell NPs shown in Fig. 2b, 2c and 2d, respectively.

**Table S1** The experimental conditions for Au@SiO<sub>2</sub> core-shell NPs.

| HAuCl <sub>4</sub> /<br>(8.14 mmol/L,<br>mL) | CTAB/(g) | TEOS/<br>(mL) | The diameter<br>of Au core<br>(nm) | The thickness<br>of silica shell<br>(nm) | Figure number        |
|----------------------------------------------|----------|---------------|------------------------------------|------------------------------------------|----------------------|
| 2.0                                          | 0.7      | 0.10          | 21.3±3.9                           | 34.2±2.5                                 | Fig. 1, Fig. S2      |
| 1.0                                          | 0.7      | 0.10          | 15.5±7.2                           | 43.1±5.4                                 | Fig. 2a, Fig. S4     |
| 2.0                                          | 0.7      | 0.05          | 21.3±4.3                           | 12.6±1.5                                 | Fig. 2b, Fig. S5a, b |
| 2.0                                          | 0.7      | 0.08          | 20.1±5.3                           | 20.8±2.4                                 | Fig. 2c, Fig. S5c, d |
| 2.0                                          | 0.7      | 0.13          | 21.2±4.6                           | 41.9±6.8                                 | Fig. 2d, Fig. S5e, f |

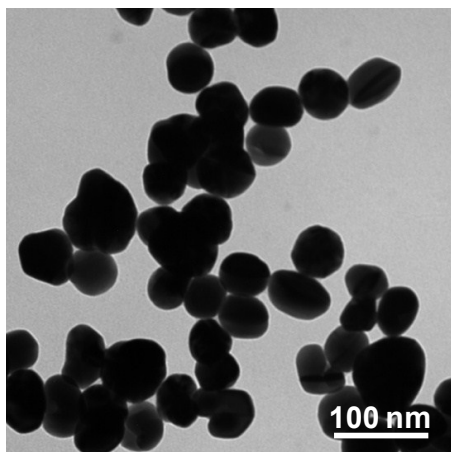

**Fig. S6** TEM image of Au NPs synthesized by a typical process in the absence of CTAB.

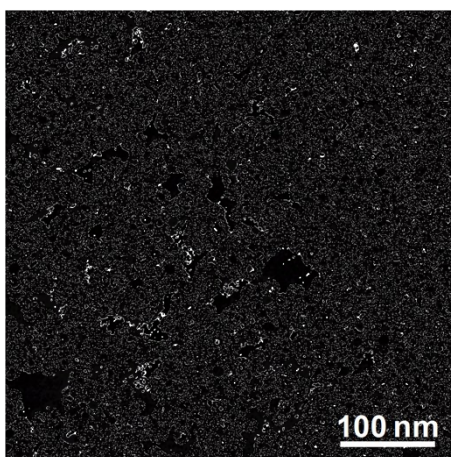

**Fig. S7** TEM image of Au NPs synthesized by a typical process in the absence of TEOS.

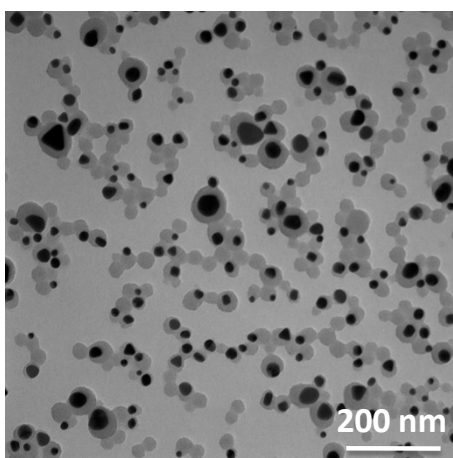

**Fig. S8** TEM image of the product synthesized by a typical process at 60 °C.

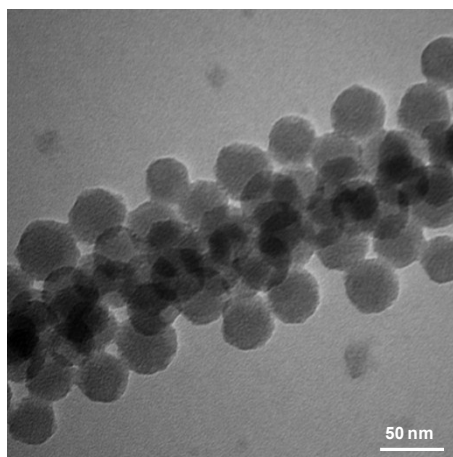

**Fig. S9** TEM image of silica NPs synthesized by a typical process in the absence of  $\text{HAuCl}_4$ , while maintaining the same reaction condition.

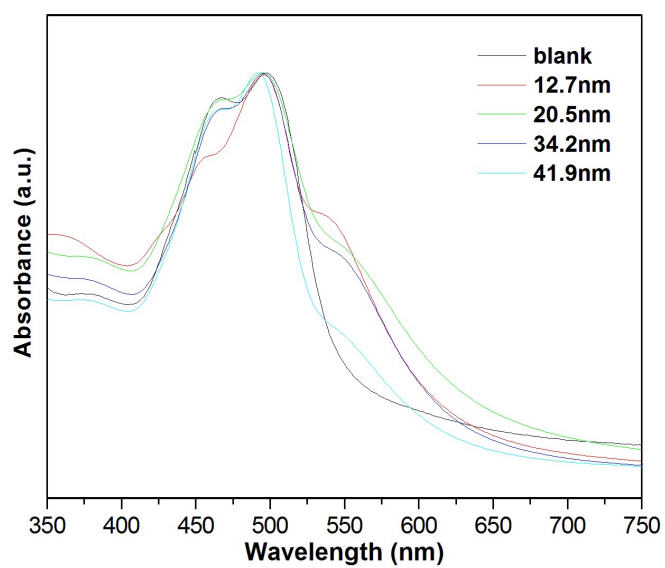

**Fig. S10** Uv-vis absorption spectra of FITC modified  $\text{SiO}_2$  (blank, as shown in Fig. S9) and  $\text{Au@SiO}_2$  core-shell NPs with different silica shell thickness.
